# Supplementary material
Source: HighWire-hosted journal article supplement (https://hw-f5-jim.highwire.org/content/jim-2022-002379)
Supplement: inline-supplementary-material-1 [file inline-supplementary-material-1.pdf]

**Supplementary Table 1.** 20 GSEA enriched gene sets significantly

| GS follow link to MSigDB                     | SIZE | ES   | NES  | NOM<br>p-val | FDR<br>q-val | FWER<br>p-val | RANK<br>AT<br>MAX | LEADING EDGE                   |
|----------------------------------------------|------|------|------|--------------|--------------|---------------|-------------------|--------------------------------|
| KEGG_PENTOSE_PHOSPHATE_PATHWAY               | 27   | 0.72 | 1.94 | 0            | 0.115        | 0.037         | 10881             | tags=70%, list=20%, signal=88% |
| KEGG_ETHER_LIPID_METABOLISM                  | 33   | 0.57 | 1.68 | 0.002        | 0.094        | 0.295         | 8725              | tags=52%, list=16%, signal=61% |
| KEGG_PANTOTHENATE_AND_COA_BIOSYNTHESIS       | 16   | 0.77 | 1.89 | 0.004        | 0.075        | 0.071         | 6709              | tags=63%, list=12%, signal=71% |
| KEGG_GLYCOLYSIS_GLUONEOGENESIS               | 62   | 0.64 | 1.87 | 0.004        | 0.078        | 0.092         | 9099              | tags=53%, list=16%, signal=64% |
| KEGG_GLYCEROLIPID_METABOLISM                 | 49   | 0.59 | 1.87 | 0.004        | 0.07         | 0.099         | 10950             | tags=55%, list=20%, signal=69% |
| KEGG_ARGININE_AND_PROLINE_METABOLISM         | 54   | 0.61 | 1.84 | 0.004        | 0.076        | 0.123         | 10289             | tags=59%, list=19%, signal=73% |
| KEGG_VASCULAR_SMOOTH_MUSCLE_CONTRACTION      | 114  | 0.58 | 1.83 | 0.004        | 0.078        | 0.132         | 8725              | tags=46%, list=16%, signal=54% |
| KEGG_BLADDER_CANCER                          | 42   | 0.6  | 1.78 | 0.004        | 0.11         | 0.173         | 13421             | tags=62%, list=24%, signal=82% |
| KEGG_PPAR_SIGNALING_PATHWAY                  | 69   | 0.58 | 1.74 | 0.004        | 0.096        | 0.21          | 12181             | tags=61%, list=22%, signal=78% |
| KEGG_PROXIMAL_TUBULE_BICARBONATE_RECLAMATION | 23   | 0.72 | 1.91 | 0.006        | 0.086        | 0.06          | 10922             | tags=74%, list=20%, signal=92% |
| KEGG_CALCIIUM_SIGNALING_PATHWAY              | 177  | 0.49 | 1.69 | 0.006        | 0.109        | 0.28          | 9019              | tags=43%, list=16%, signal=51% |
| KEGG_RETINOL_METABOLISM                      | 64   | 0.54 | 1.76 | 0.008        | 0.108        | 0.197         | 10882             | tags=52%, list=20%, signal=64% |
| KEGG_DRUG_METABOLISM_OTHER_ENZYMES           | 51   | 0.51 | 1.7  | 0.008        | 0.103        | 0.265         | 10646             | tags=45%, list=19%, signal=56% |
| KEGG_NEUROACTIVE_LIGAND_RECEPTOR_INTERACTION | 271  | 0.47 | 1.69 | 0.008        | 0.101        | 0.286         | 13242             | tags=52%, list=24%, signal=68% |
| KEGG_P53_SIGNALING_PATHWAY                   | 68   | 0.57 | 1.69 | 0.01         | 0.105        | 0.281         | 12731             | tags=56%, list=23%, signal=73% |

Note: Gene Set Enrichment Analysis: GSEA; Kyoto Encyclopedia of Genes and Genomes: KEGG
